# Supplementary material for: Giant viruses as reservoirs of antibiotic resistance genes
Source: PubMed Central journal article supplement — Nat Commun. 2024 Aug 30;15:7536. doi: 10.1038/s41467-024-51936-z (PMC11364636; doi:10.1038/s41467-024-51936-z), 2024-08-30
Supplement: 41467_2024_51936_MOESM3_ESM.pdf [file 41467_2024_51936_MOESM3_ESM.pdf]

## **Description of Additional Supplementary Files:**

**Supplementary Data 1:** Details of NCLDV genomes analyzed in this study.

**Supplementary Data 2:** Details of phage genomes analyzed in this study.

**Supplementary Data 3:** List of ARGs annotated in NCLDVs and their annotation details.

**Supplementary Data 4:** List of ARGs annotated in phages and their annotation details.

**Supplementary Data 5:** List of potential efflux pump genes annotated in NCLDVs.

**Supplementary Data 6:** List of potential efflux pump genes annotated in phages.

**Supplementary Data 7:** ARG-, MGE-, and VF-carriage of different NCLDV families.

**Supplementary Data 8:** ARG-, MGE-, and VF-carriage of different phage families.

**Supplementary Data 9:** Details of the two NCLDV *dfr* genes randomly selected for functional validation.

**Supplementary Data 10:** List of virulence genes annotated in NCLDVs and their annotation details.

**Supplementary Data 11:** List of virulence genes annotated in phages and their annotation details.
